# Supplementary material for: N-donor functionalized N-heterocyclic carbene nickel(II) complexes in the Kumada coupling
Source: Royal Society of Chemistry journal article supplement (doi:10.1039/b905036a), 2009-01-01
Supplement: b905036a.pdf [file b905036a.pdf]

Supporting Information

N-donor functionalized N-heterocyclic carbene nickel(II) complexes in the  
Kumada coupling

Joris Berding, Thomas F. van Dijkman, Martin Lutz, Anthony L. Spek and Elisabeth  
Bouwman\*

Coordination and Bio-Inorganic Chemistry, Leiden Institute of Chemistry, Leiden University,  
P.O. Box 9502, 2300 RA, Leiden, The Netherlands, and Bijvoet Center for Biomolecular  
Research, Crystal and Structural Chemistry, Utrecht University, Padualaan 8, 3584 CH  
Utrecht, The Netherlands

[bouwman@chem.leidenuniv.nl](mailto:bouwman@chem.leidenuniv.nl)

|                                                                                     |    |
|-------------------------------------------------------------------------------------|----|
| Figure S1. Hydrogen bonding in the crystal structure of <b>5a</b>                   | S2 |
| Table S1. Hydrogen bonding geometry in the crystal structure of <b>5a</b> .         | S2 |
| Figure S2. <sup>1</sup> H NMR spectrum of complex <b>7</b> in DMSO.                 | S3 |
| Figure S3. COSY NMR spectrum of complex <b>8</b> in CDCl <sub>3</sub> .             | S4 |
| Figure S4. Quaternion fit of the crystal structure of <b>5a</b> .                   | S5 |
| Figure S5. Quaternion fit of the crystal structure of <b>8</b> .                    | S6 |
| Figure S6. C-H···Ni and C-H···π interactions in the crystal structure of <b>8</b> . | S7 |
| References                                                                          | S8 |

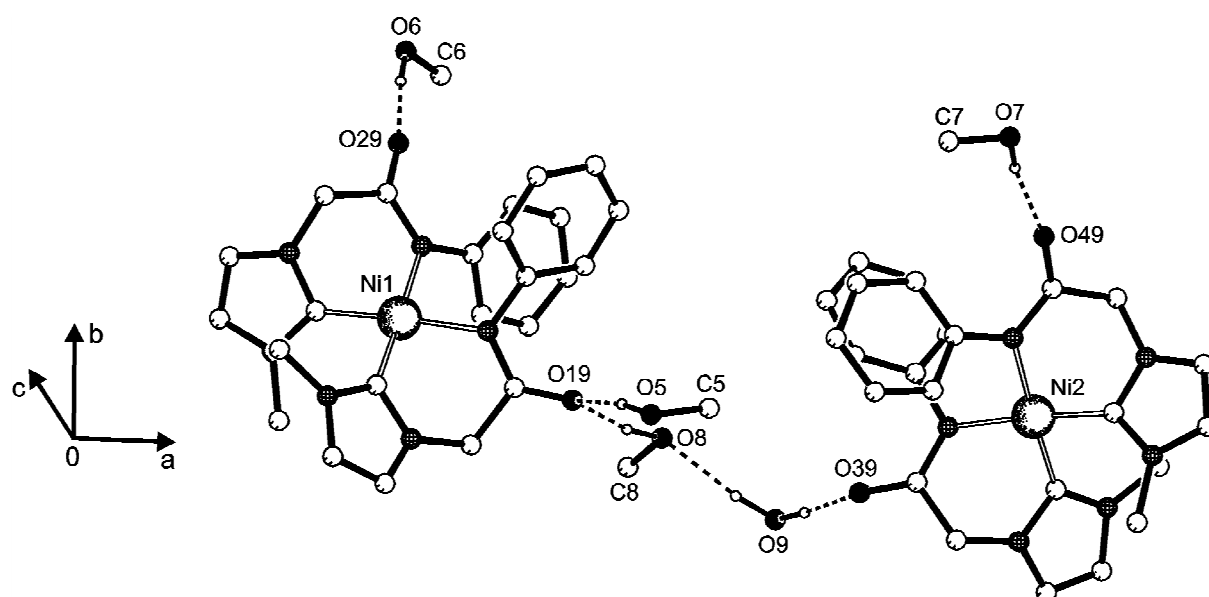

Figure S1. Discrete hydrogen-bonded aggregate of metal complexes, methanol and water molecules in the asymmetric unit of **5a**. C-H hydrogen atoms are omitted for clarity. Geometrical characterizations of the hydrogen bonds are provided in Table S1.

Table S1. Hydrogen bonding geometry in the crystal structure of **5a**.

|              | D-H [Å] | H···A [Å] | D···A [Å] | D-H···A [°] |
|--------------|---------|-----------|-----------|-------------|
| O5-H5O···O19 | 0.96    | 1.80      | 2.740(2)  | 168         |
| O6-H6O···O29 | 0.93    | 1.75      | 2.675(2)  | 173         |
| O7-H7O···O49 | 0.89    | 1.86      | 2.731(3)  | 166         |
| O8-H8O···O19 | 1.05    | 1.70      | 2.737(3)  | 169         |
| O9-H9A···O8  | 1.02    | 1.98      | 2.934(3)  | 154         |
| O9-H9B···O39 | 0.96    | 1.94      | 2.797(3)  | 175         |

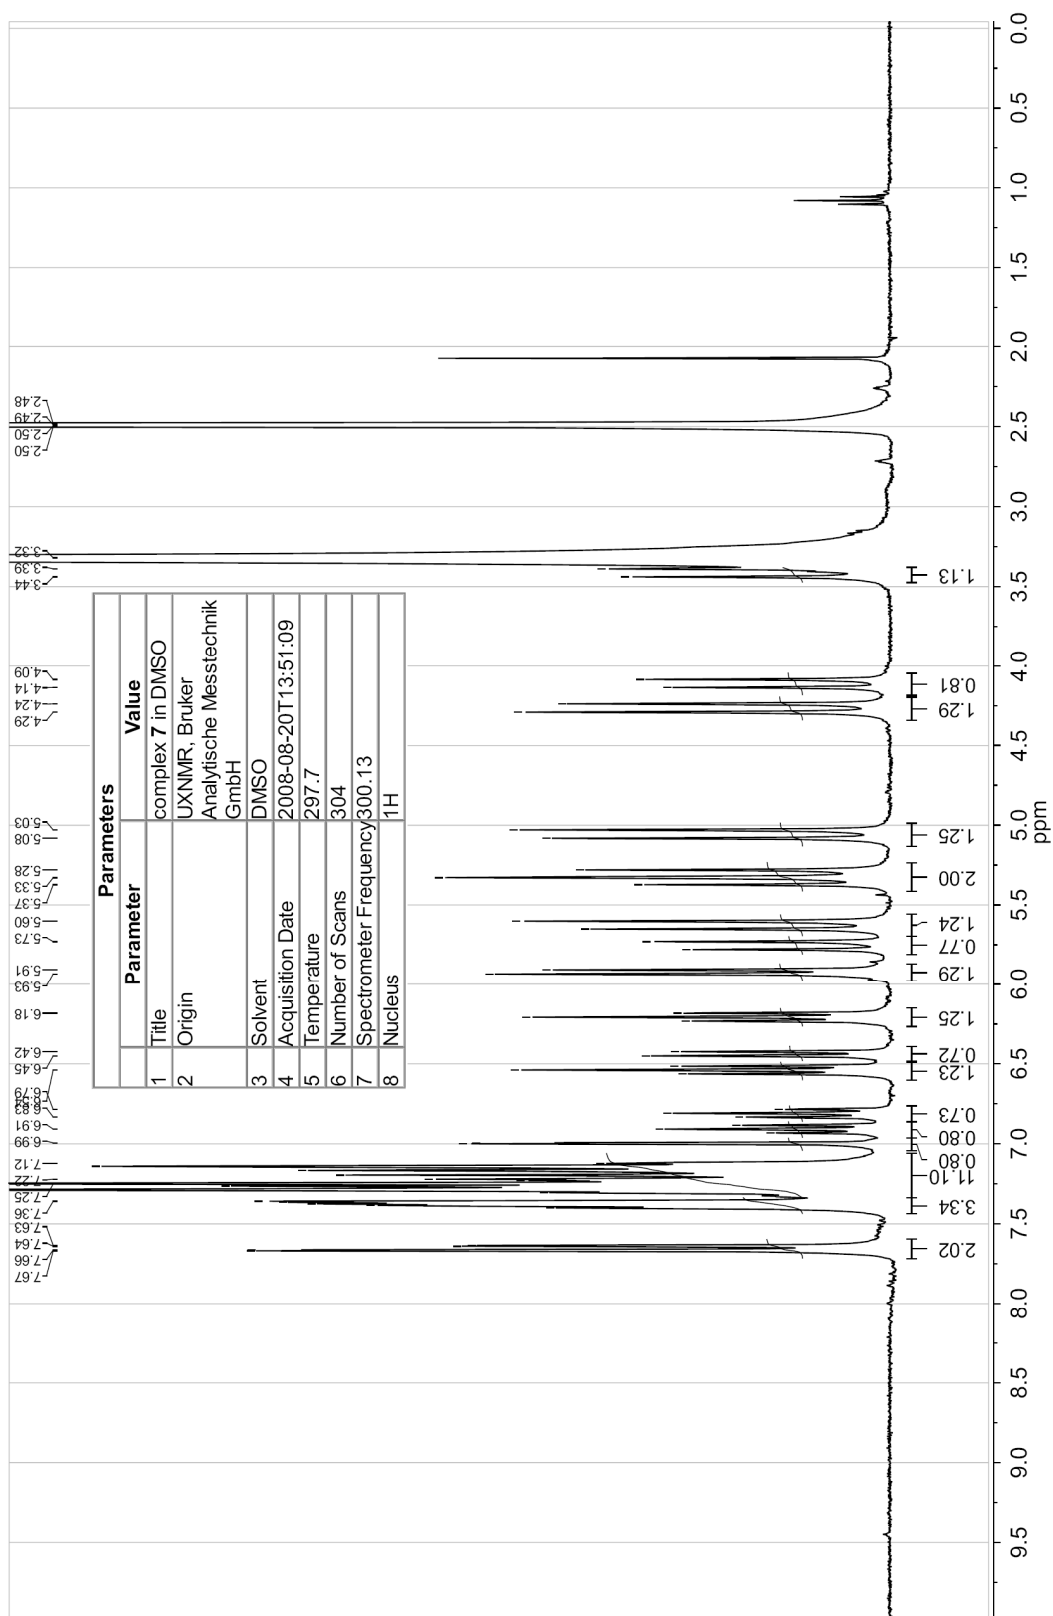

Figure S2.  $^1\text{H}$  NMR spectrum of complex **7** in DMSO. The figure was prepared with the program MestReNova.<sup>1</sup>

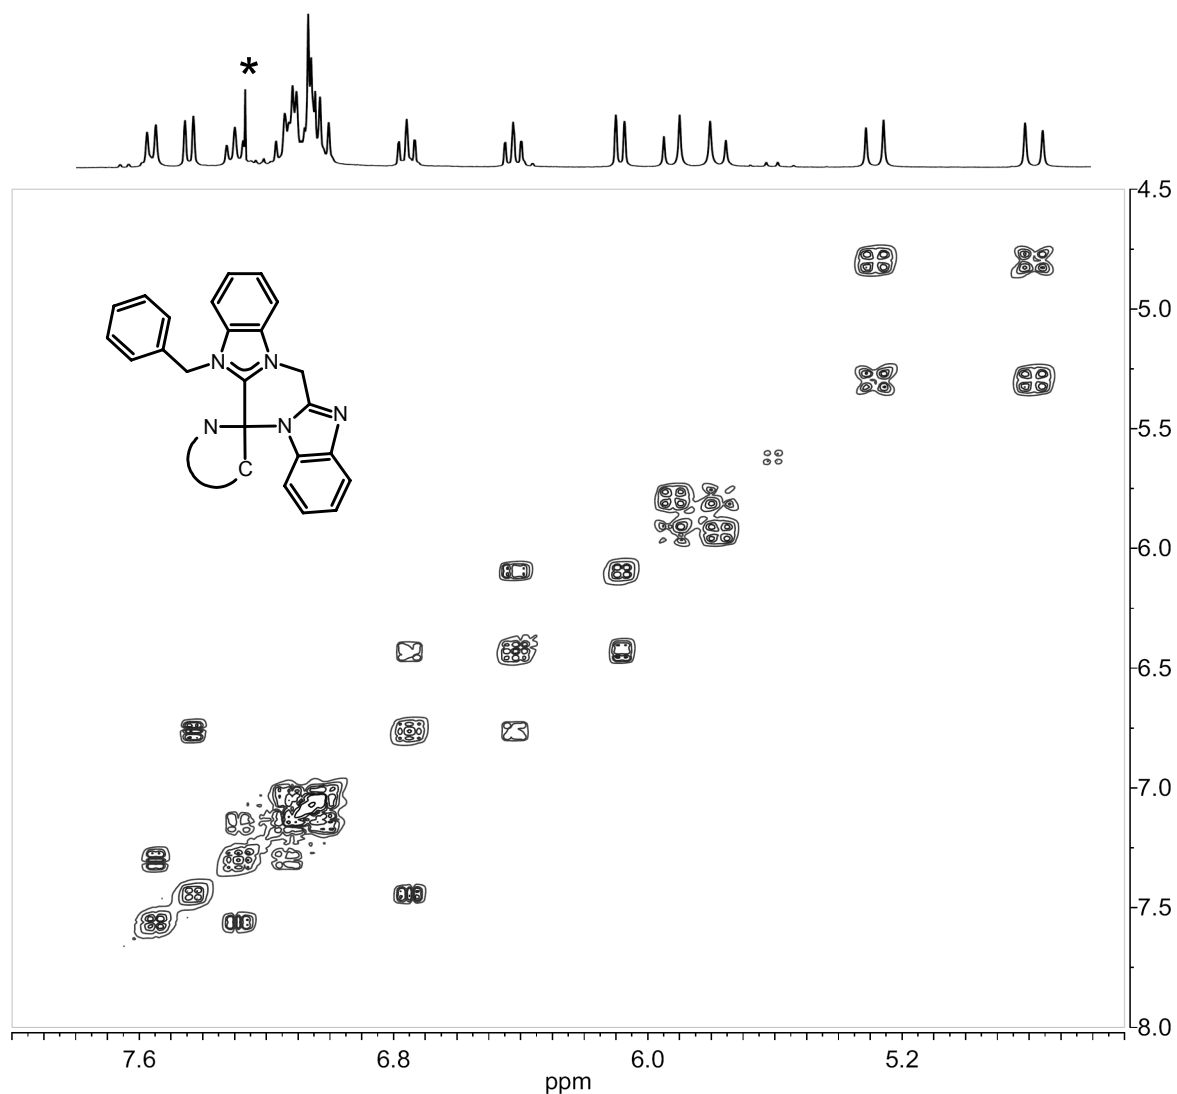

Figure S3. COSY NMR spectrum of complex **8** in  $\text{CDCl}_3$ . The residual solvent peak is marked with (\*). The figure was prepared with the program MestReNova.<sup>1</sup>

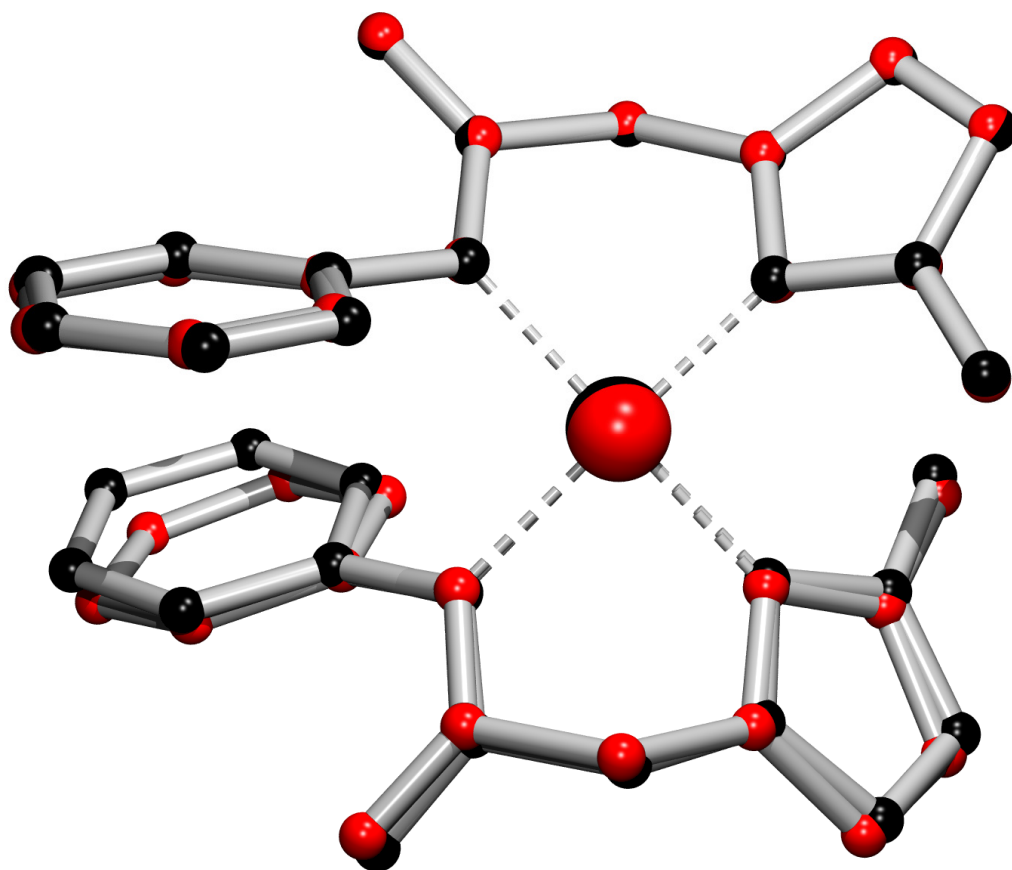

Figure S4. Quaternion fit of the two independent metal complexes in the crystal structure of **5a**, based on the six-membered chelate ring of the first ligand. The calculation was performed with the program PLATON.<sup>2</sup>

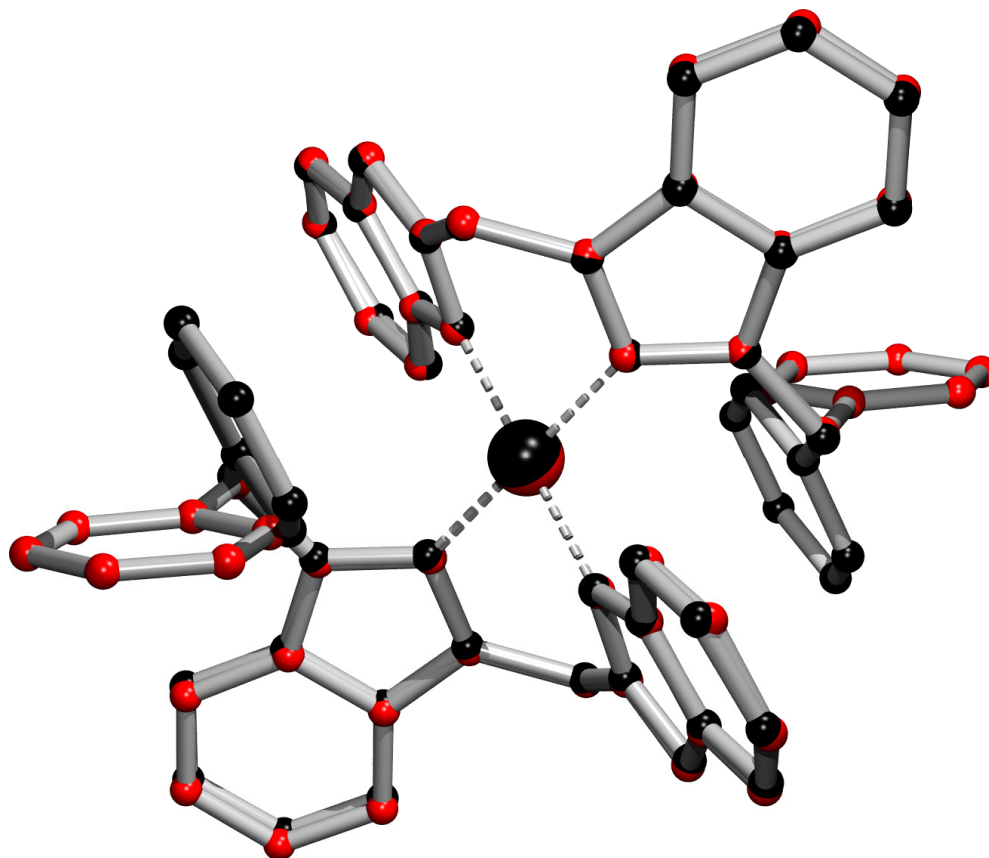

Figure S5. Quaternion fit of the two independent metal complexes in the crystal structure of **8**, based on the six-membered chelate ring. Both independent molecules are located on an inversion centre. The calculation was performed with the program PLATON.<sup>2</sup>

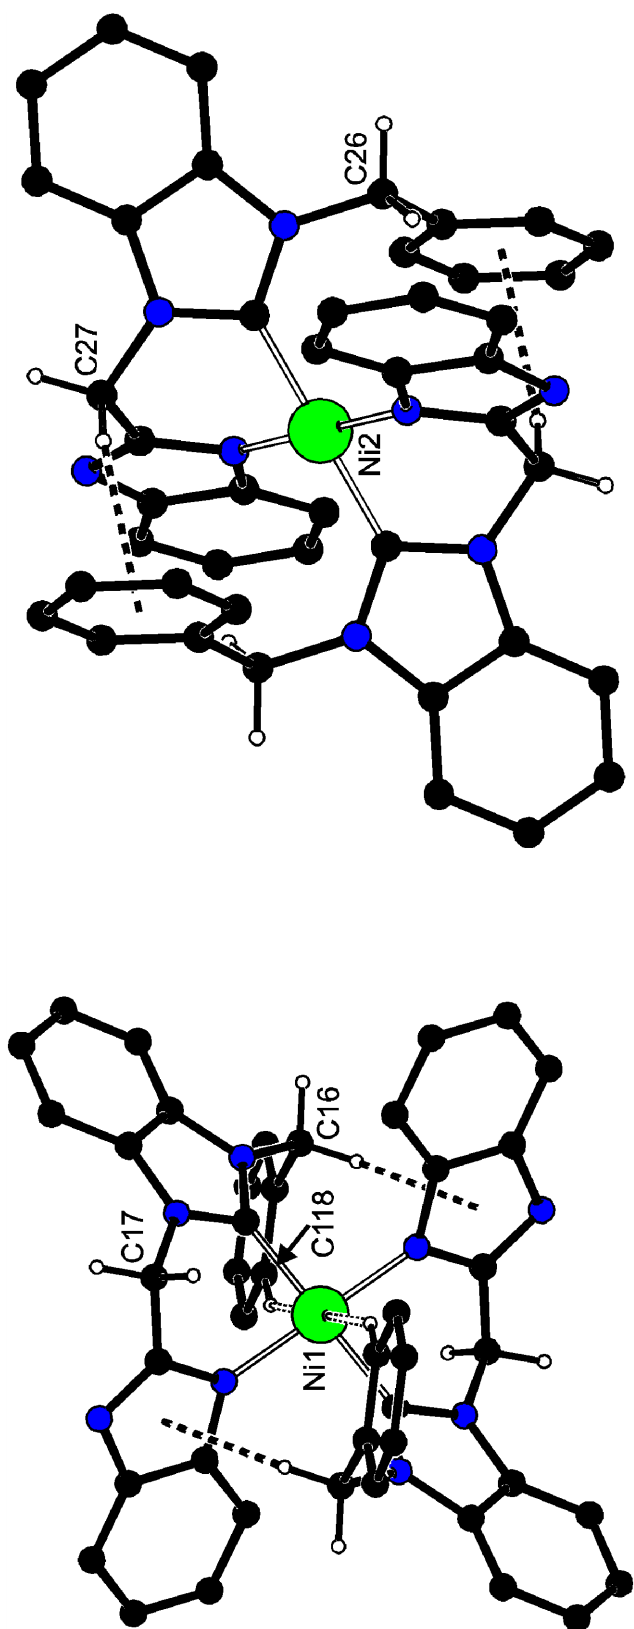

Figure S6. C-H...Ni and C-H... $\pi$  interactions in the two independent molecules of **8**.  
H118...Ni1, 2.72 Å; C118...Ni1, 3.579(2) Å; C118-H118...Ni1, 151°; H16A...Cg, 2.54 Å;  
C16...Cg, 3.485(2) Å; C16-H16A...Cg, 161°; H27B...Cg, 2.65 Å; C27...Cg, 3.5420(19); C27-  
H27B...Cg, 150°.

## References

- 1 MestReNova, version 5.1.0, Mestrelab Research S.L., Santiago de Compostela, Spain, [www.mestrelab.com](http://www.mestrelab.com), 2009.
- 2 A. L. Spek, *J. Appl. Cryst.*, 2003, **36**, 7.
